# Supplementary material for: TheC. eleganshomolog of nucleoporin Nup98 is required for the integrity and function of germline P granules
Source: Oxford University Press journal article supplement (doi:10.1242/dev.047654), 2010-03-25
Supplement: dev047654tables2.pdf [file dev047654tables2.pdf]

**Table S2. RNAi screen of *C. elegans* nucleoporins**

| <i>C. elegans</i> gene | Vertebrate Nup | Percentage broods with abnormal GFP::PGL-1 (n) | Abnormal K76 staining | Embryonic lethality (%)        |
|------------------------|----------------|------------------------------------------------|-----------------------|--------------------------------|
| <i>npp-1</i>           | Nup54          | 28 (13)                                        | No                    | 95                             |
| <i>npp-2</i>           | Nup85          | 33 (6)                                         | No                    | 31                             |
| <i>npp-3</i>           | Nup205         | 33 (6)                                         | No                    | 100                            |
| <i>npp-4</i>           | Nup45/58       | 0 (5)                                          | No                    | 84                             |
| <i>npp-5</i>           | Nup107         | 20 (5)                                         | No                    | (reported 0*)                  |
| <i>npp-6</i>           | Nup160         | 18 (17)                                        | No                    | 98                             |
| <i>npp-7</i>           | Nup153         | 44 (32)                                        | YES                   | 81                             |
| <i>npp-8</i>           | Nup155         | 78 (23)                                        | YES                   | 85                             |
| <i>npp-9</i>           | Nup358         | 78 (83)                                        | YES <sup>†</sup>      | 80                             |
| <i>npp-10</i>          | Nup98/96       | 100 (22)                                       | YES                   | 95                             |
| <i>npp-11</i>          | Nup62          | 0 (6)                                          | No                    | 88                             |
| <i>npp-12</i>          | Gp120          | 0 (10)                                         |                       | (reported 0)                   |
| <i>npp-13</i>          | Nup93          | 25 (12)                                        | No                    | 58                             |
| <i>npp-14</i>          | Nup214         | 0 (16)                                         |                       | (reported 0)                   |
| <i>npp-15</i>          | Nup133         | 0 (6)                                          |                       | (reported 0)                   |
| <i>npp-16</i>          | Nup50          | 0 (7)                                          |                       | (reported 0)                   |
| <i>npp-17</i>          | RAE1           | 0 (6)                                          |                       | (reported 0)                   |
| <i>npp-18</i>          | Seh1           | 0 (7)                                          |                       | (reported 0)                   |
| <i>npp-19</i>          | Nup35          | 28 (31)                                        | No                    | 84                             |
| <i>npp-20</i>          | Sec13R         | 0 (8)                                          |                       | 70                             |
| <i>npp-21</i>          | Tpr            | 0 (6)                                          |                       | (lethal only in <i>rnf-3</i> ) |
| <i>npp-22</i>          | TMEM48         | 0 (6)                                          |                       | (reported 0)                   |
| <i>C09G9.2</i>         | Nup43          | 0 (10)                                         |                       | (reported 0)                   |
| <i>mel-28</i>          | ELYS           | 0 (23)                                         |                       | 68                             |
| <i>nx1-1</i>           |                | 0 (8)                                          | No                    | 97                             |
| <i>ama-1</i>           |                | 0 (8)                                          | No                    | 92                             |
| <i>rps-6</i>           |                | 0 (3)                                          |                       | 50                             |
| <i>lmn-1</i>           |                | 0 (12)                                         | No                    | 95                             |
| Vector                 |                | 0 (14)                                         | No                    | 0                              |

JH2107 (GFP::PGL-1) was subjected to the indicated RNAi for 22 hours by feeding and the hermaphrodites were scored for embryos with abnormal GFP::PGL-1. Percentages are the numbers of broods with one or more embryos with abnormal GFP::PGL-1. All positives and several negatives were subjected to a secondary RNAi screen using wild-type worms and endogenous PGL-1 scored by immunostaining (K76 antibody) (Strome and Wood, 1982). The efficacy of the RNAi treatments was evaluated by scoring embryonic lethality; values (including those of no lethality) were similar to those reported previously (Galy et al., 2003). Identities of vertebrate homologs are according to previous reports (Galy et al., 2003; Franz et al., 2005).

\*As in Galy et al. (Galy et al., 2003).

<sup>†</sup>Defects might be secondary to general cytological abnormalities (see Fig. 1F).
